# Supplementary material for: Microfluidic Preparation of 89Zr-Radiolabelled Proteins by Flow Photochemistry
Source: Preprints.org preprint supplement (doi:10.20944/preprints202101.0379.v1), 2021-01-20
Supplement: Supplementary file 2 [file supplementary]

**Electronic Supporting Information (ESI)**

**Microfluidic preparation of 89Zr-radiolabeled proteins by flow photochemistry**

Daniel F. Earley,1 Amaury Guillou,1 Dion van der Born,2, Alex J. Poot,3 and Jason P. Holland1*

1. Department of Chemistry, University of Zurich, Winterthurerstrasse 190, CH-8057, Zurich, Switzerland
2. FutureChemistry Agro Business Park 10, 6708 PW, Wageningen, The Netherlands
3. Department of Radiology and Nuclear Medicine, UMC Utrecht, Heidelberglaan 100, 3584 CX Utrecht, The Netherlands

* **Corresponding Author:**

Prof. Dr Jason P. Holland

Tel: +41.44.63.53.990

E-mail: [jason.holland@chem.uzh.ch](mailto:jason.holland@chem.uzh.ch)

Website: [www.hollandlab.org](http://www.hollandlab.org)

**First Author:**

Daniel F. Earley

Email: [daniel.earley@chem.uzh.ch](mailto:daniel.earley@chem.uzh.ch)

**Table of Contents**

[**Figure S1.** 1H (400 MHz, CDCl3, 298 K) NMR spectrum of compound **2** 3](#_Toc54102581)

[**Figure S2.** 13C{1H} (101 MHz, CDCl3, 298 K) NMR spectrum of compound **2** 3](#_Toc54102582)

[**Figure S3.** HRMS (negative mode) spectrum of compound **2** 3](#_Toc54102583)

[**Figure S4.** 1H (400 MHz, CDCl3, 298 K) NMR spectrum of compound **4** 4](#_Toc54102584)

[**Figure S5.** 13C{1H} (101 MHz, CDCl3, 298 K) NMR spectrum of compound **4** 4](#_Toc54102585)

[**Figure S6.** HRMS spectrum of compound **4** 4](#_Toc54102586)

[**Figure S7.** 1H (400 MHz, CDCl3, 298 K) NMR spectrum of compound **5** 5](#_Toc54102587)

[**Figure S8.** 13C{1H} (101 MHz, CDCl3, 298 K) NMR spectrum of compound **5** 5](#_Toc54102588)

[**Figure S9.** HRMS spectrum of compound **5** 5](#_Toc54102589)

[**Figure S10.** 1H (400 MHz, MeOD, 298 K) NMR spectrum of compound **6** 6](#_Toc54102590)

[**Figure S11.** 13C{1H} (101 MHz, MeOD, 298 K) NMR spectrum of compound **6** 6](#_Toc54102591)

[**Figure S12.** HRMS (negative mode) spectrum of compound **6** 6](#_Toc54102592)

[**Figure S13.** 1H (500 MHz, DMSO-d6, 298 K) NMR spectrum of compound **1** 7](#_Toc54102593)

[**Figure S14.** 13C{1H} (125 MHz, DMSO-d6, 298 K) NMR spectrum of compound **1** 7](#_Toc54102594)

[**Figure S15.** 2D-COSY (DMSO-d6) NMR spectrum of compound **1** 8](#_Toc54102595)

[**Figure S16.** 2D-hetereonuclear HSQC (DMSO-d6) NMR spectrum of compound **1** 8](#_Toc54102596)

[**Figure S17.** HRMS spectrum of compound **1** 9](#_Toc54102597)

[**Supporting Results** 9](#_Toc54102598)

[89Zr-Radiolabelling of DFO-PEG3-Et-ArN3 (**1**) 9](#_Toc54102599)

[**Figure S18.** Characterisation data for the radiochemical synthesis of [89Zr]ZrDFO-PEG3-Et-ArN3. A) Radio-iTLC chromatograms of ‘free’ 89Zr complexed as [89Zr]Zr-DTPA (blue) and [89Zr]ZrDFO-PEG3-Et-ArN3 (black); B) HPLC chromatograms of the ligand (compound **1**; blue), [natZr]ZrDFO-PEG3-Et-ArN3 (green) and [89Zr]ZrDFO-PEG3-Et-ArN3 (black). 9](#_Toc54102600)

[**References** 10](#_Toc54102601)

## Figure S1. 1H (400 MHz, CDCl3, 298 K) NMR spectrum of compound 2

## Figure S2. 13C{1H} (101 MHz, CDCl3, 298 K) NMR spectrum of compound 2

## Figure S3. HRMS (negative mode) spectrum of compound 2


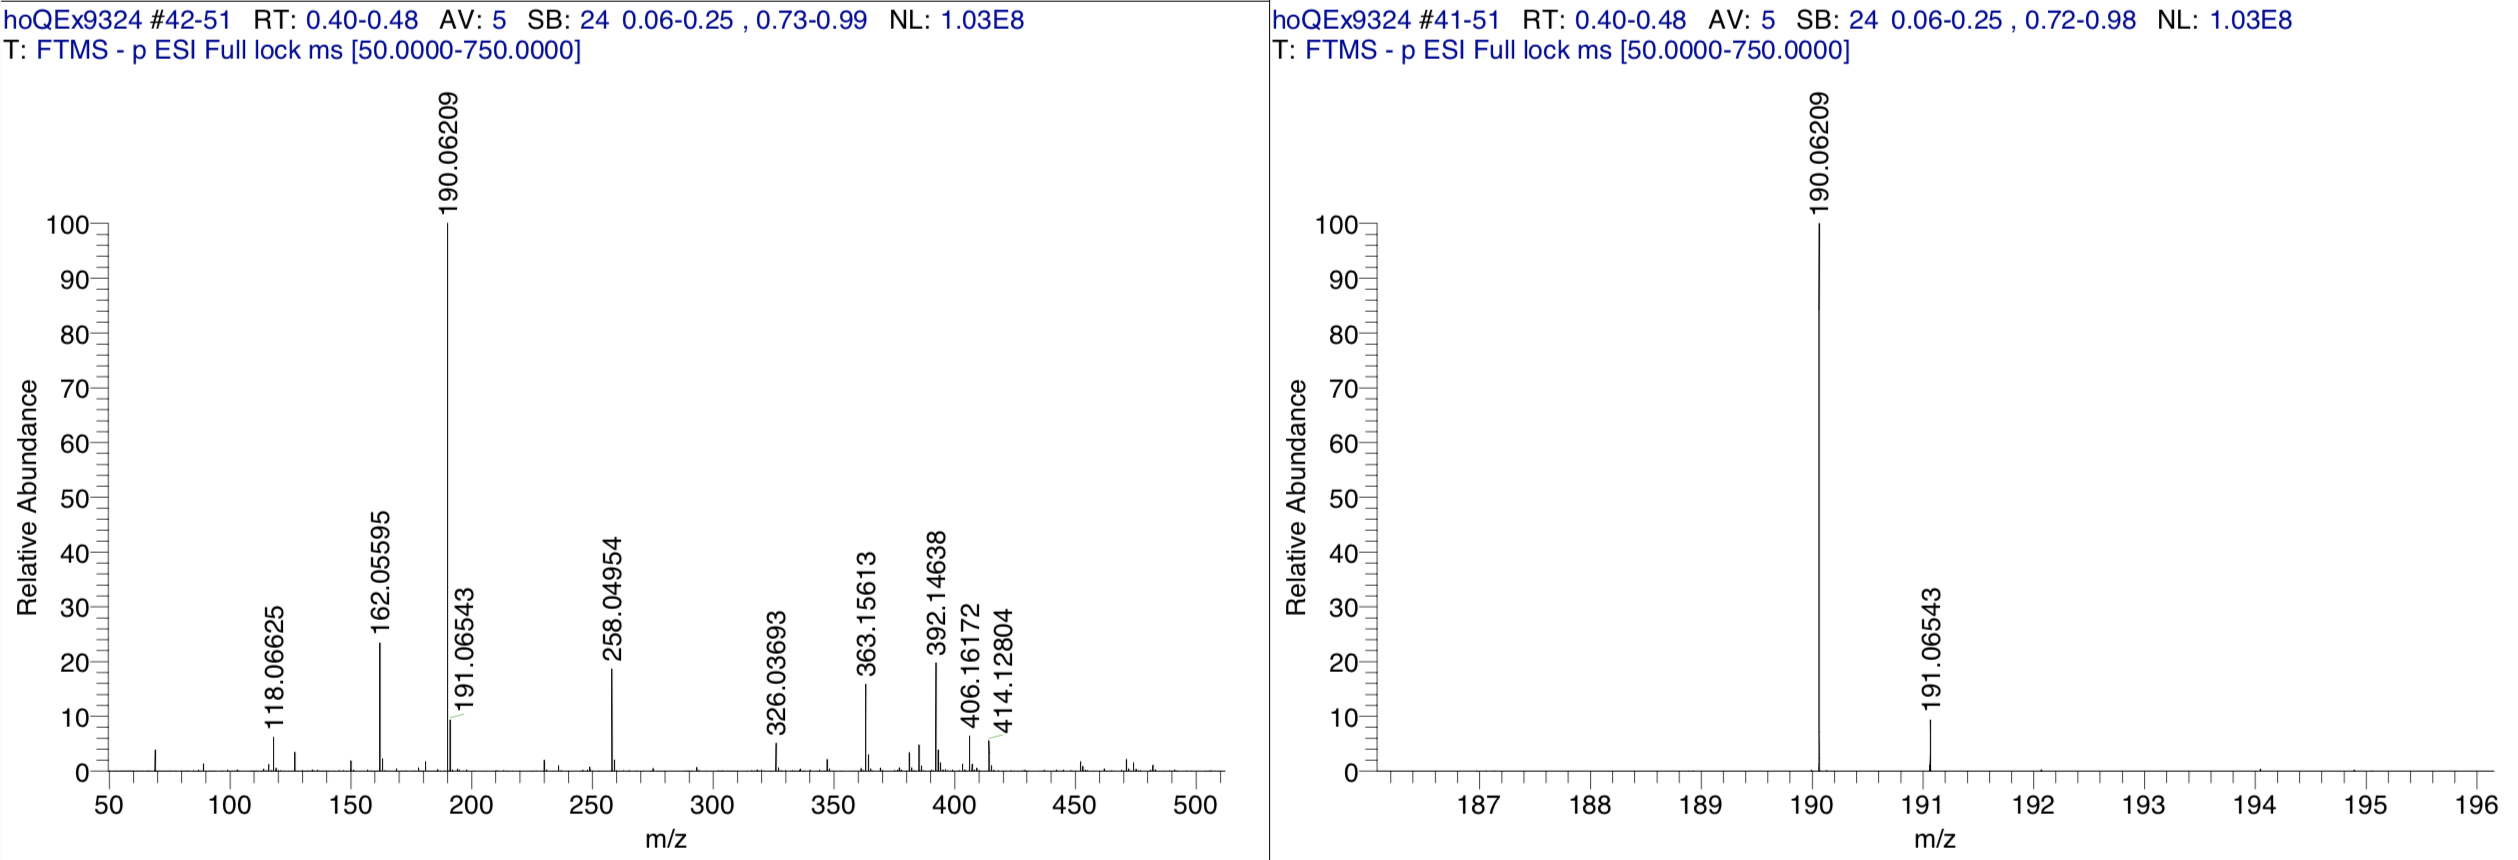


## Figure S4. 1H (400 MHz, CDCl3, 298 K) NMR spectrum of compound 4

## Figure S5. 13C{1H} (101 MHz, CDCl3, 298 K) NMR spectrum of compound 4

## Figure S6. HRMS spectrum of compound 4


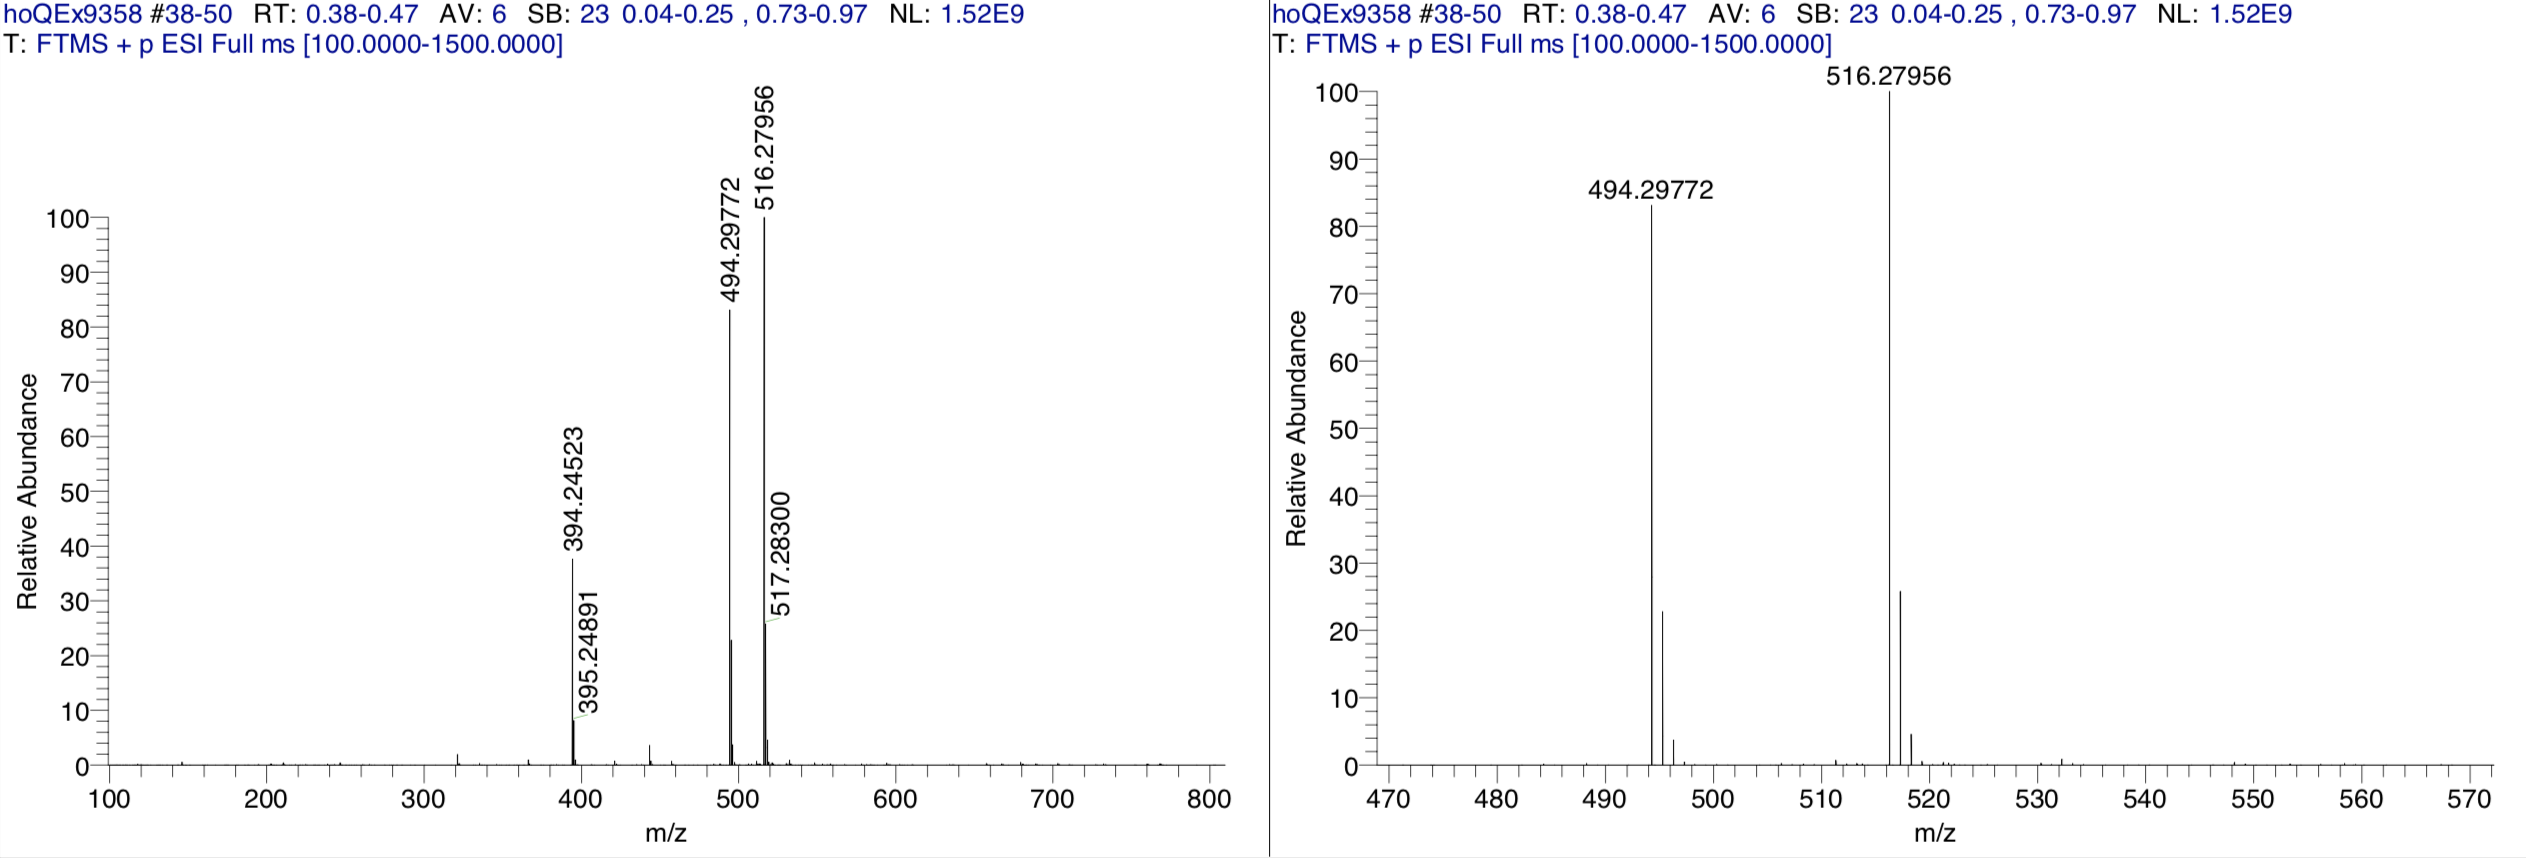


## Figure S7. 1H (400 MHz, CDCl3, 298 K) NMR spectrum of compound 5

## Figure S8. 13C{1H} (101 MHz, CDCl3, 298 K) NMR spectrum of compound 5

## Figure S9. HRMS spectrum of compound 5


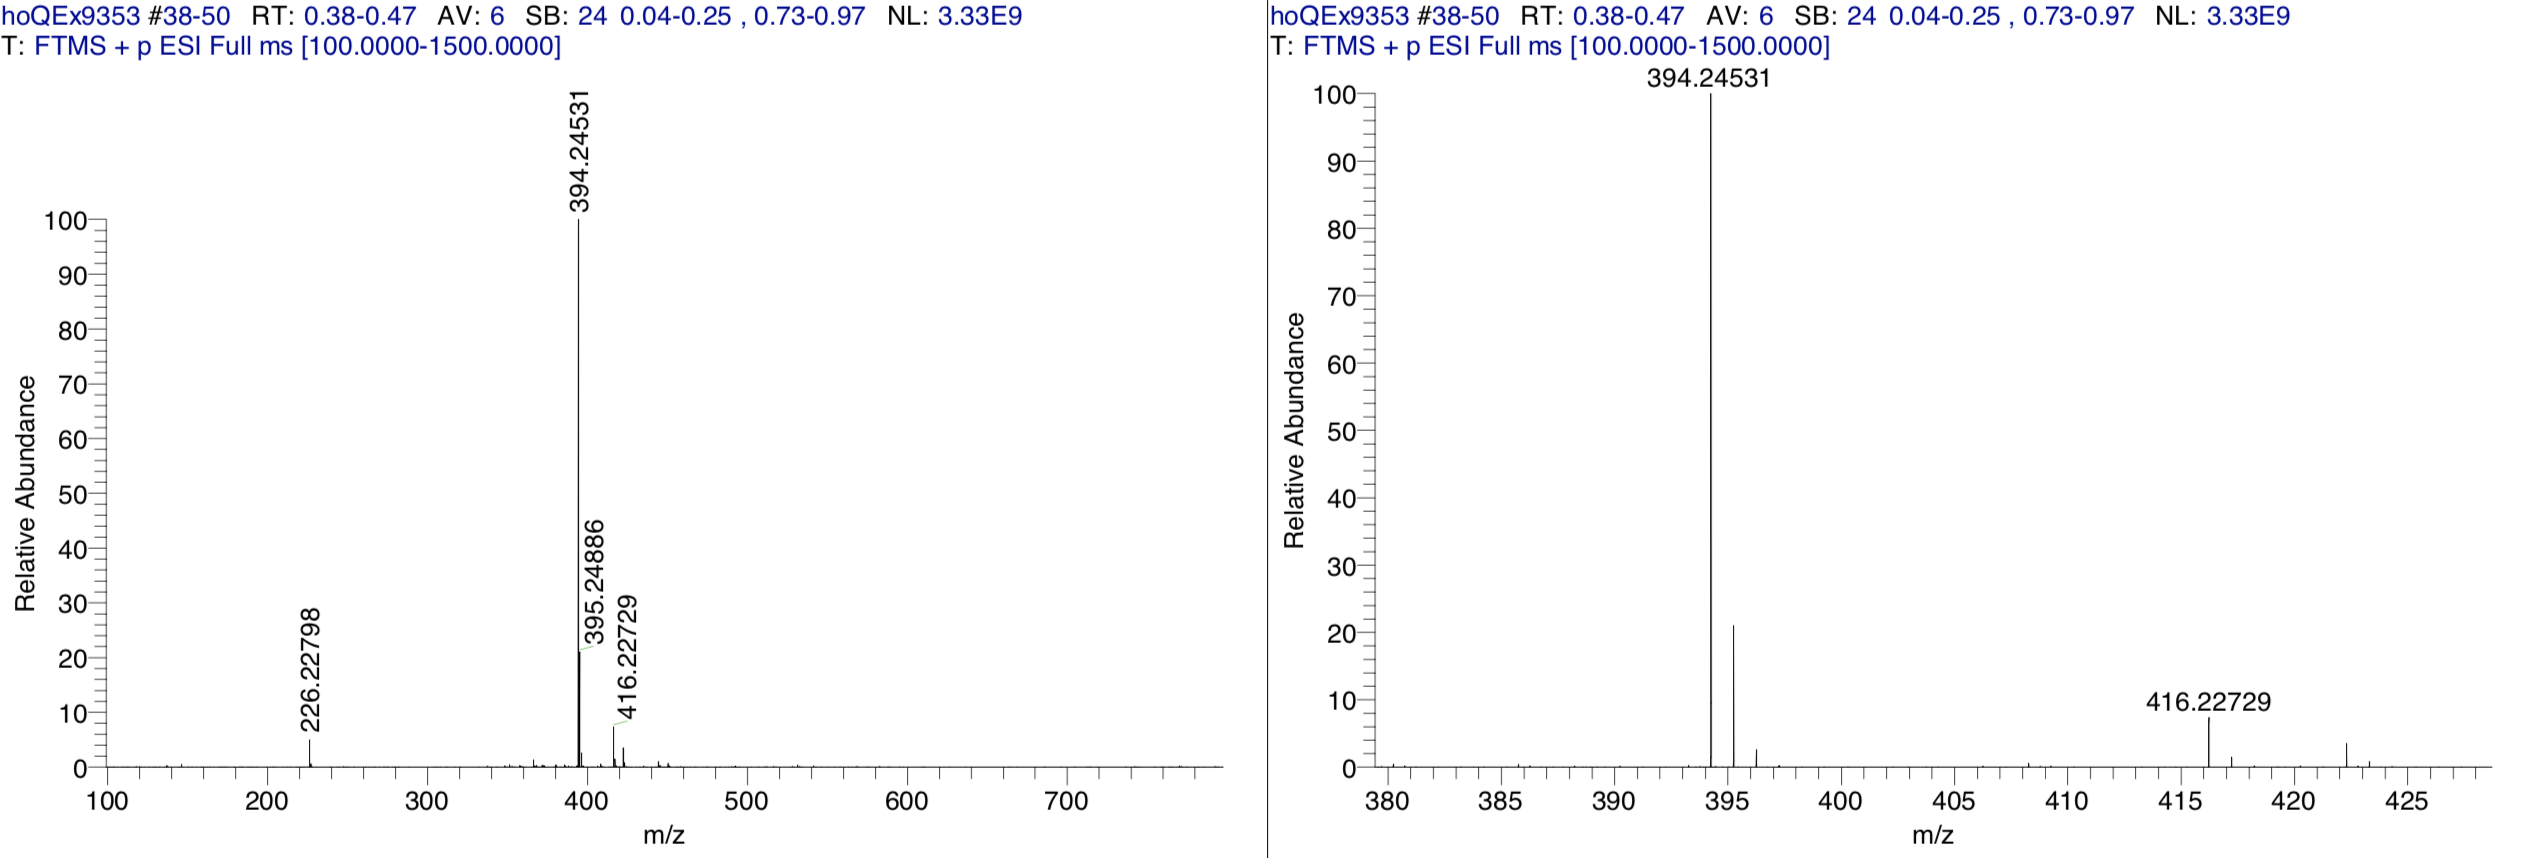


## Figure S10. 1H (400 MHz, MeOD, 298 K) NMR spectrum of compound 6

## Figure S11. 13C{1H} (101 MHz, MeOD, 298 K) NMR spectrum of compound 6

## Figure S12. HRMS (negative mode) spectrum of compound 6

**
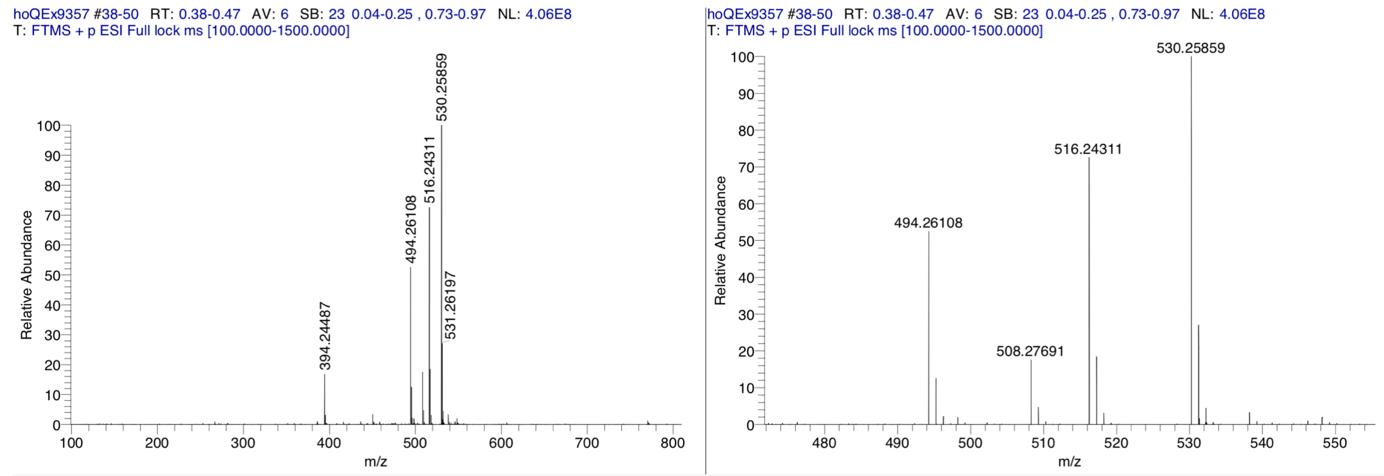
**

## Figure S13. 1H (500 MHz, dmso-d6, 298 K) NMR spectrum of compound 1


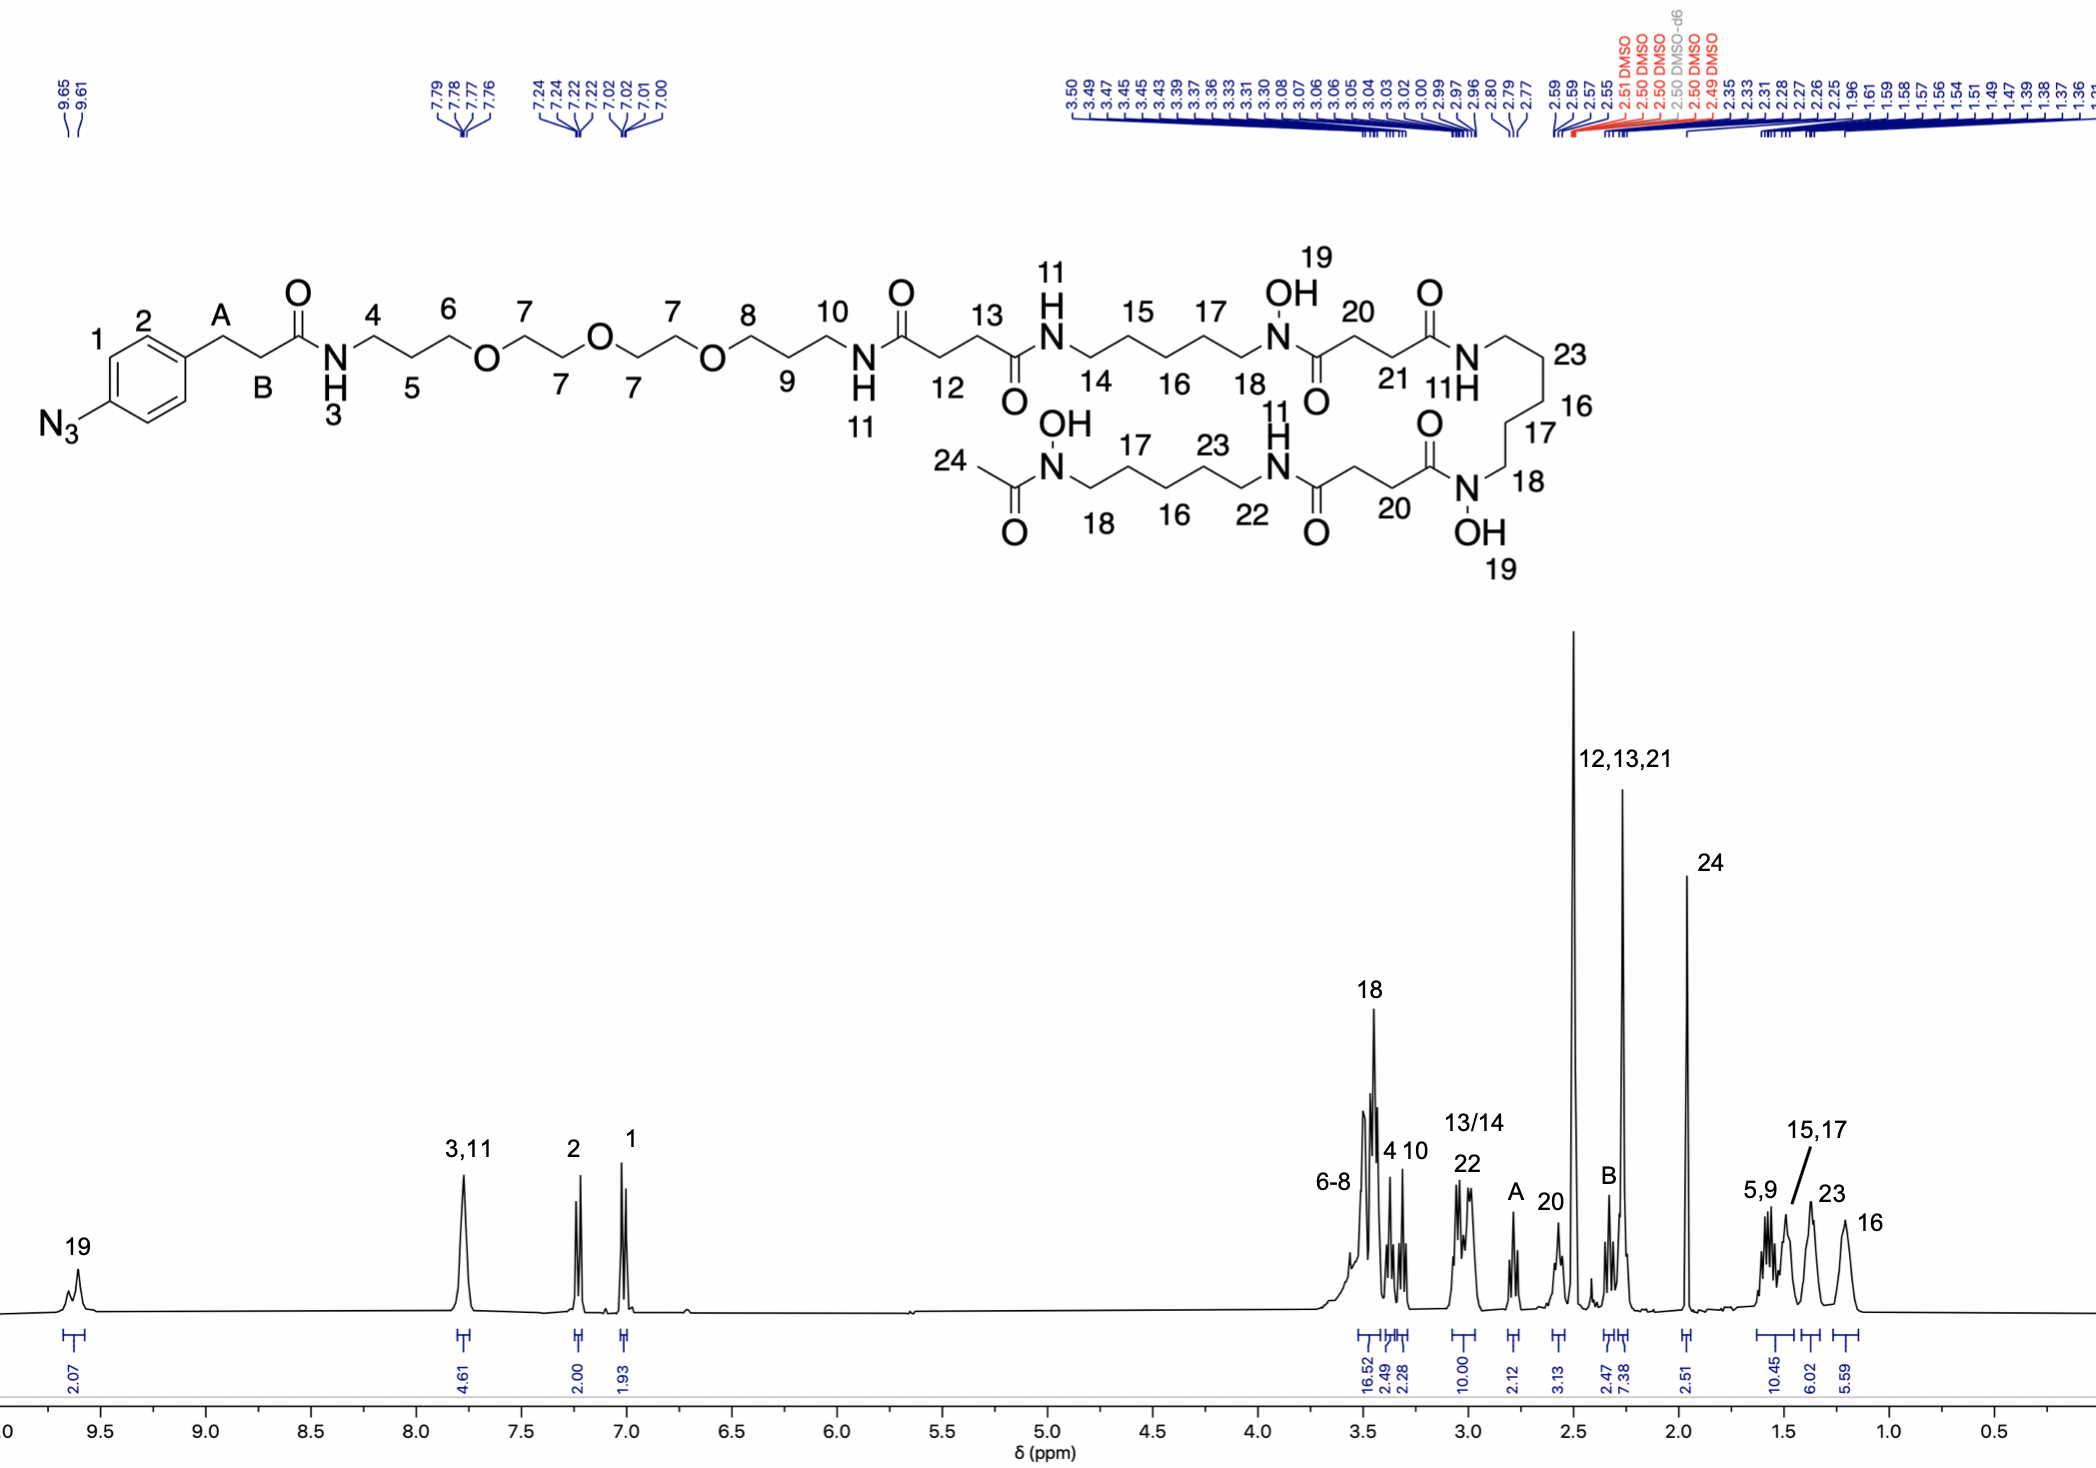


## Figure S14. 13C{1H} (125 MHz, dmso-d6, 298 K) NMR spectrum of compound 1

## Figure S15.2D-COSY (dmso-d6) NMR spectrum of compound 1


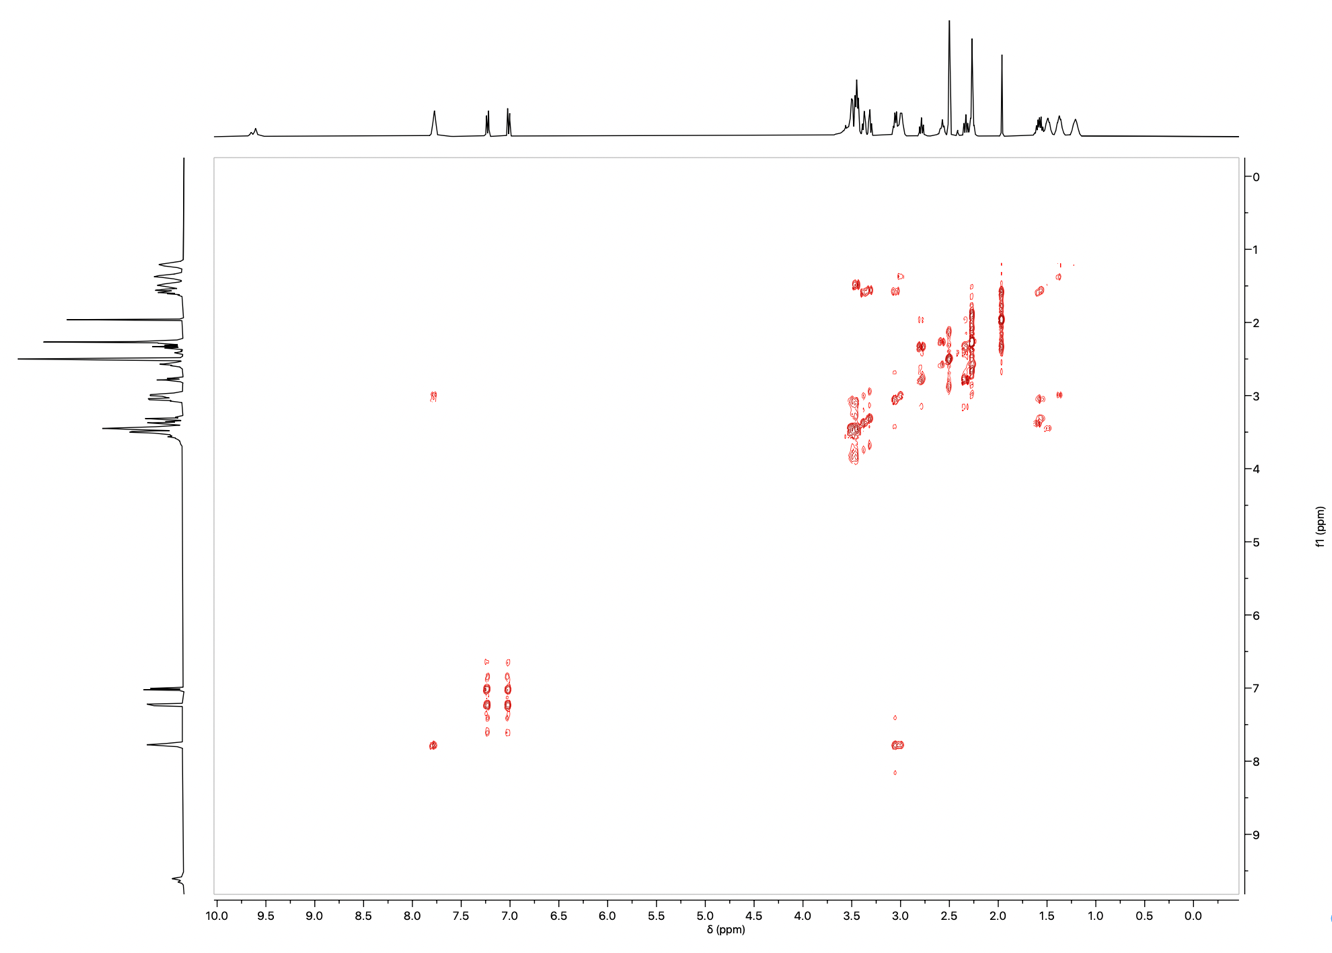


## Figure S16.2D-hetereonuclear HSQC (dmso-d6) NMR spectrum of compound 1


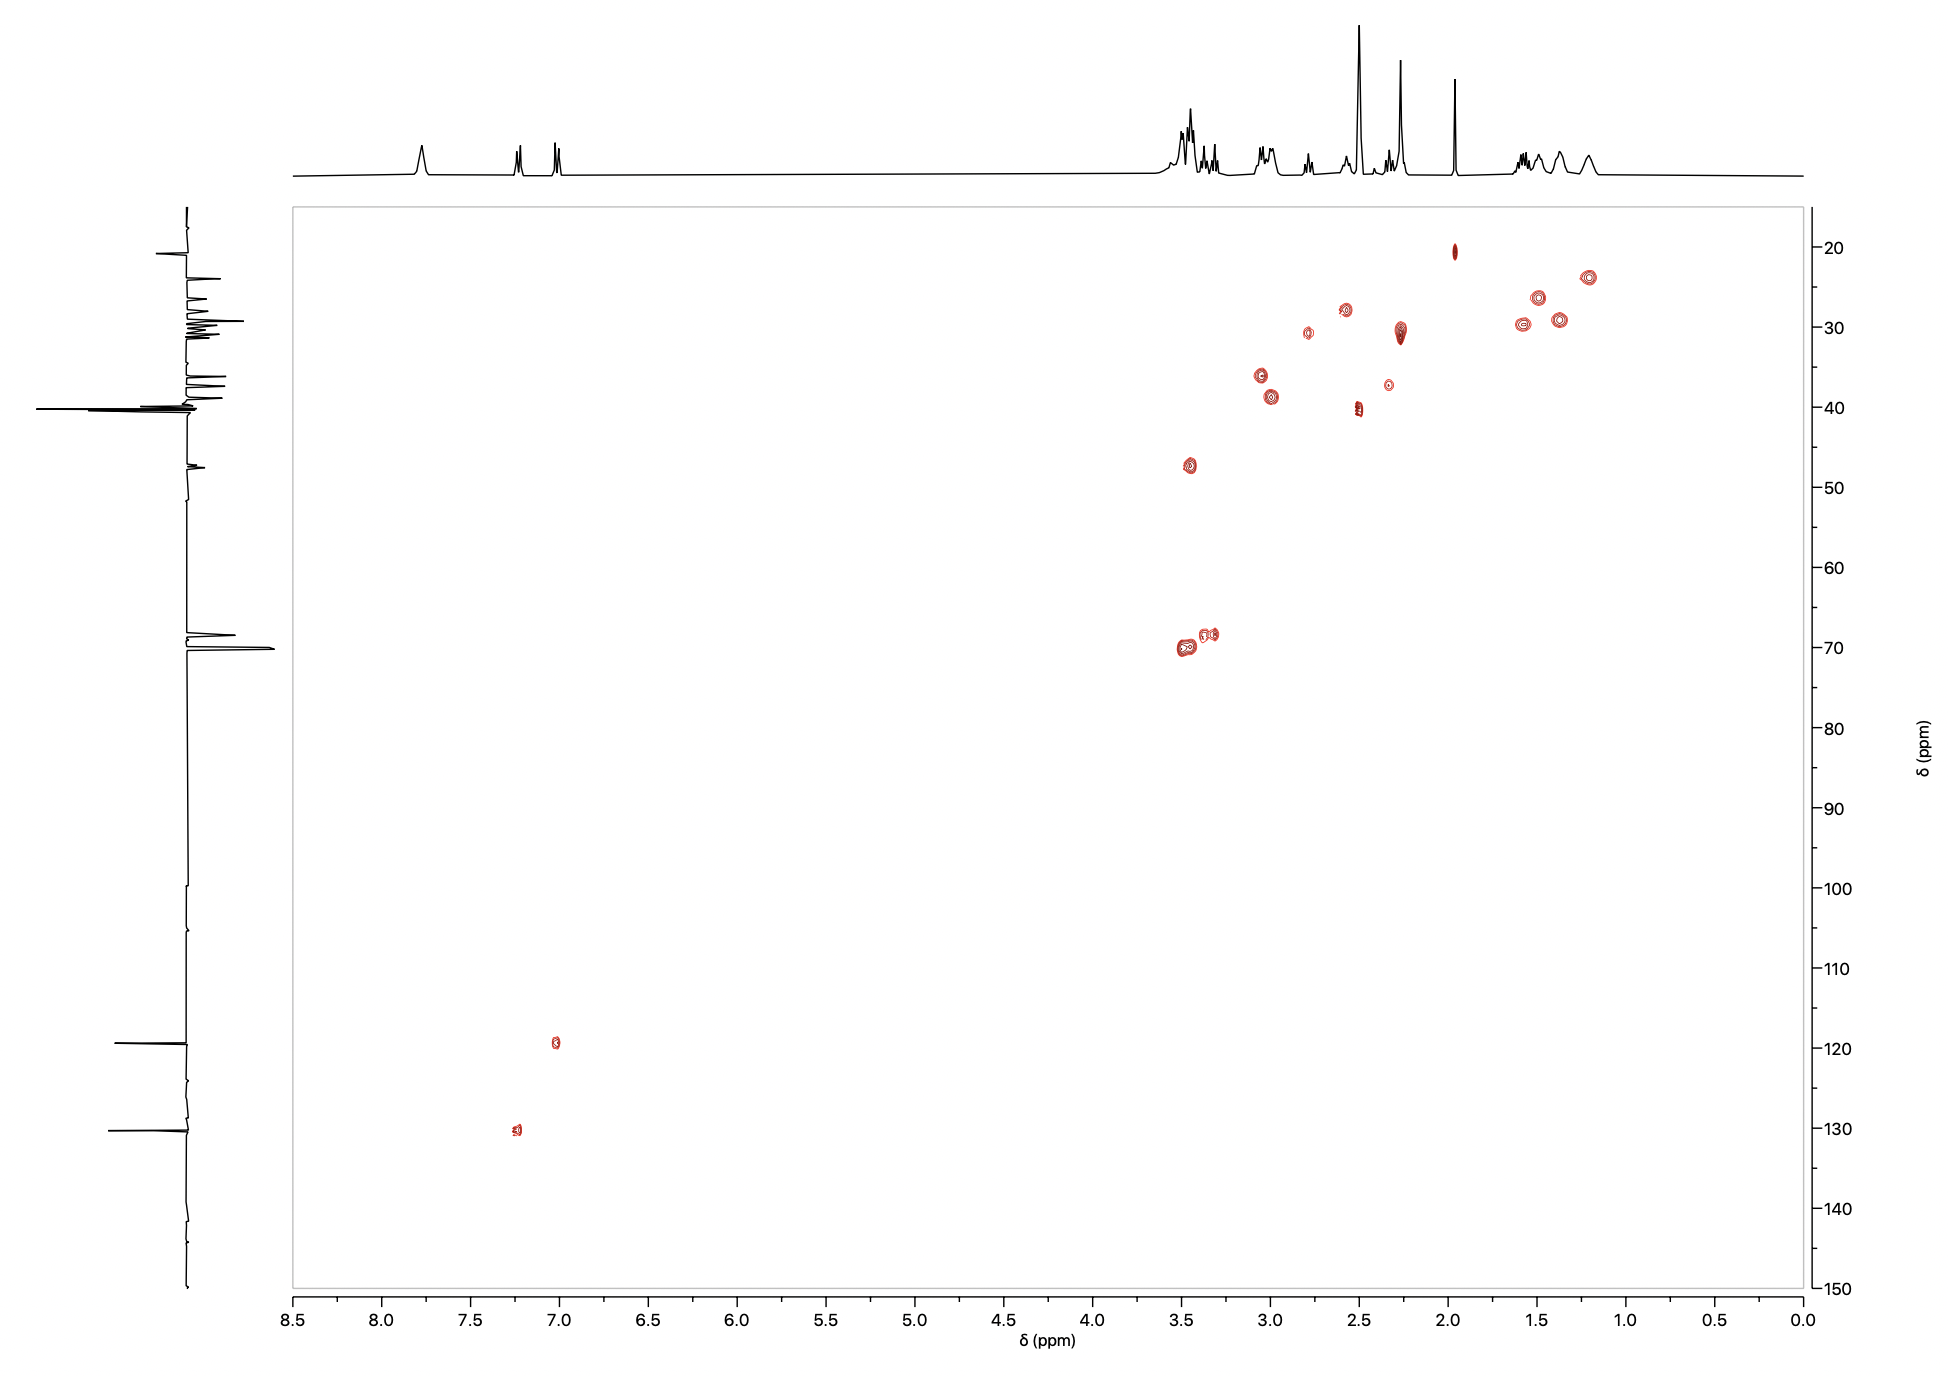


## Figure S17. HRMS spectrum of compound 1


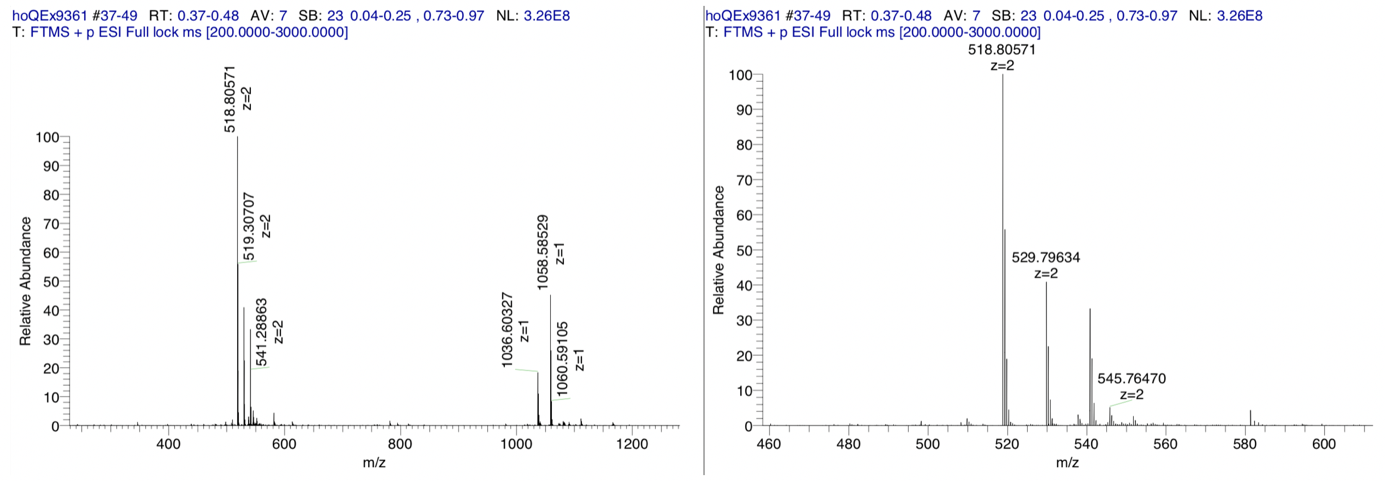


# **Supporting Results**

## 89Zr-Radiolabelling of DFO-PEG3-Et-ArN3 (1)

The [89Zr]Zr-radiolabelling of DFO-PEG3-Et-ArN3, compound **1** to give the [89Zr]Zr-radiolabelled complex [89Zr]ZrDFO-PEG3-Et-ArN3 (89Zr-**1**+) was performed in triplicate. As an example, incubation of ligand **1** (20 μL; 2 mM stock solution; MW = 1036.22) with [89Zr]Zr-oxalate (40 μl; 5.532 MBq) in Chelex® H2O (40 μl) was performed in the dark for 10 mins at pH 8.0. The formation of 89Zr-**1**+ was confirmed by radio iTLC and radio HPLC analysis (**Figure S18**).

## Figure S18. Characterisation data for the radiochemical synthesis of [89Zr]ZrDFO-PEG3-Et-ArN3. A) Radio-iTLC chromatograms of ‘free’ 89Zr complexed as [89Zr]Zr-DTPA (blue) and [89Zr]ZrDFO-PEG3-Et-ArN3 (black); B) HPLC chromatograms of the ligand (compound 1; blue), [natZr]ZrDFO-PEG3-Et-ArN3 (green) and [89Zr]ZrDFO-PEG3-Et-ArN3 (black).
